# Supplementary material for: Tailor-made crystalline structures of truncated S-layer proteins on heteropolysaccharides
Source: Royal Society of Chemistry journal article supplement (doi:10.1039/b810211b), 2008-10-29
Supplement: b810211b.pdf [file b810211b.pdf]

## Supplementary data

Tailor-made crystalline structures of truncated S-layer proteins on  
heteropolysaccharides

*Bernhard Schuster and Uwe B. Sleytr*

Zentrum für NanoBiotechnologie, Universität für Bodenkultur Wien, Gregor-Mendel-Strasse  
33, 1180 Vienna, Austria, Europe. E-mail: [bernhard.schuster@boku.ac.at](mailto:bernhard.schuster@boku.ac.at).

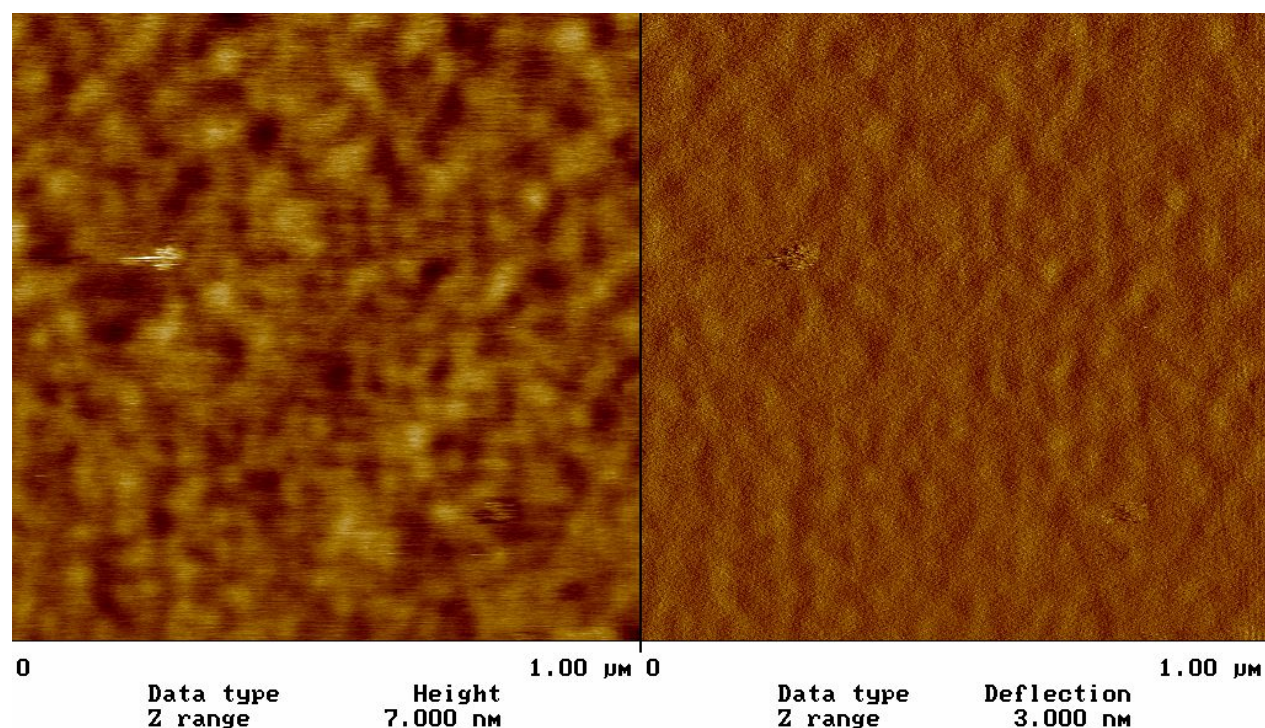

**Fig. S1** AFM image (contact mode, left: height image, right: deflection image) of the chemisorbed layer of heteropolysaccharides (SCWP).

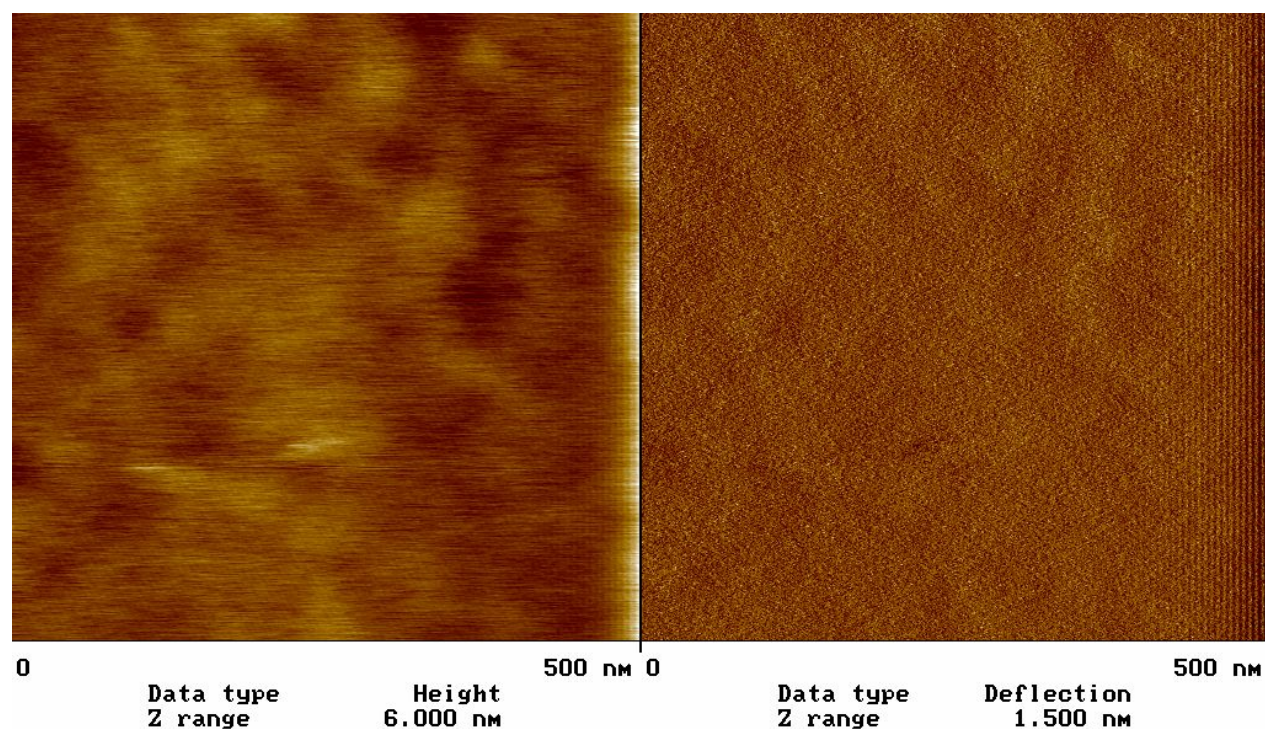

**Fig. S2** AFM image (contact mode, left: height image, right: deflection image) of the truncated S-layer protein SbpA (NRS) comprising only the SCWP-binding sequences bound on a heteropolysaccharides (SCWP)-covered gold surface. There was only a random binding observed and no lattice formation occurred.

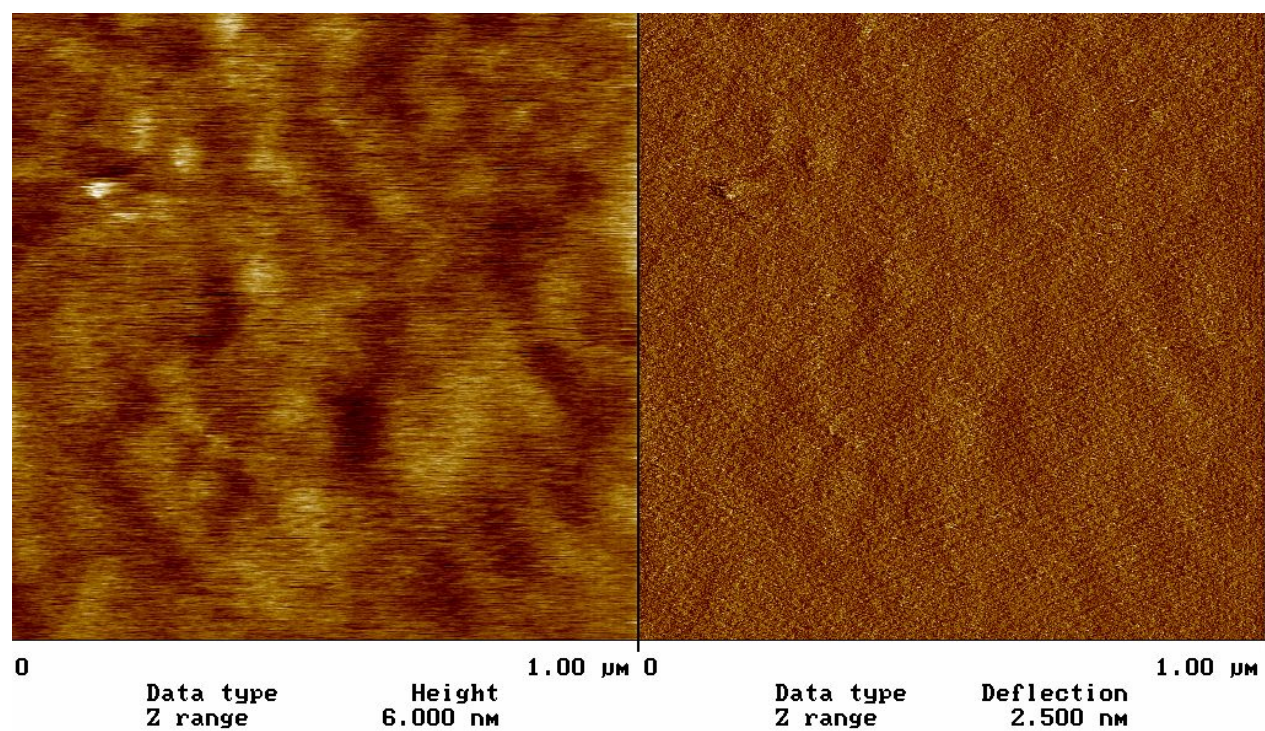

**Fig. S3** AFM image (contact mode, left: height image, right: deflection image) of a mixture of 3/7 (mol/mol) of NRS/SAD on a heteropolysaccharides-covered gold surface.

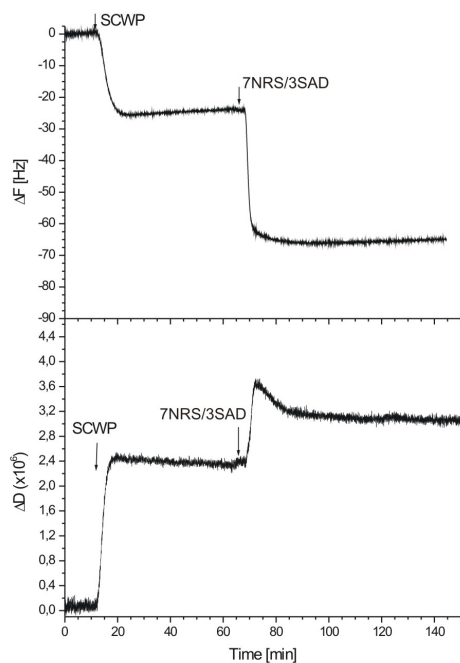

**Fig. S4** Changes in frequency  $\Delta f$  (upper curve) and dissipation  $\Delta D$  (lower curve) versus time upon sequential exposure of a gold surface to thiolated heteropolysaccharides (SCWP) and a mixture of 7/3 (mol/mol) of NRS/SAD.

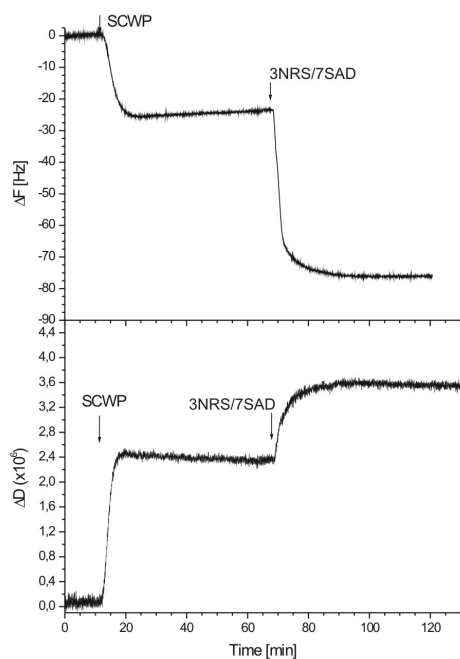

**Fig. S5** Changes in frequency  $\Delta f$  (upper curve) and dissipation  $\Delta D$  (lower curve) versus time upon sequential exposure of a gold surface to thiolated heteropolysaccharides (SCWP) and a mixture of 3/7 (mol/mol) of NRS/SAD.
